# Supplementary material for: Exploring bisphenol S removal mechanism with multi-enzymes extracted from waste sludge and reed sediment
Source: Research Square preprint supplement (doi:10.21203/rs.3.rs-1442986/v1), 2022-05-05
Supplement: Supplementary file 1 [file 4eabe9175bbf074a1af75553.docx]

**Supporting Information**

**Exploring bisphenol S removal mechanism with multi-enzymes extracted from waste sludge and reed sediment**

*Hong Liu a,* Xin Zheng *a, Guangying Hou a**, Chunguang Liu a,*[[1]](#footnote-1)*

*a School of Environmental Science and Engineering, Shandong University, No. 72 Jimo Binhai Road, Qingdao, Shandong Province 266237, China*


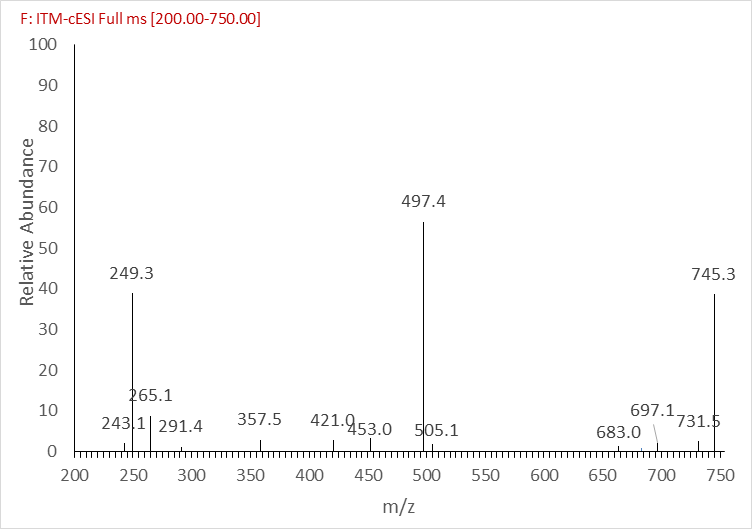


Fig.S1 Mass spectra of bisphenol S and their degradation products.

1. [↑](#footnote-ref-1)
